# Supplementary material for: Impact of 3D Cloud Structures on the Atmospheric Trace Gas Products from UV-VIS Sounders – Part III: bias estimate using synthetic and observational data
Source: Copernicus journal article supplement (doi:10.5194/amt-2021-331), 2021-11-03
Supplement: Supplementary file [file amt-2021-331-AC2-supplement.pdf]

## Response to interactive comments from Referee #2

Below the comments from Referee #2 are given in italic font. Our responses to the comments are shown in roman font.

### General comments

- *The presentation of the results needs an improvement. Most figures are difficult to read: they contain too much information (Fig. 9 and 10) and/or are too small (e.g., Fig. 12) and/or a different type of graph could be more suitable (why are the dots in Fig. 5, 9 and 10 connected by lines?) and/or could better be skipped (Fig. 9.b and 10.b) (see detailed comments). Please avoid legends overlapping the graphs (e.g., in Fig 9 and 10). The description of some figures is sometimes insufficient (Fig 2. for example, does not have any explanation in the text), or is unclear (e.g., what is the added value of the skewness etc. in Figs 9.b and 10.b to your conclusions)?*

An explanation of Fig. 2 have been added to the text. The other points have been answered in specific comments 23 and 26 below.

- *The VIIRS cloud mask and cloud shadow mask are used, but are not reliable for cloud and cloud shadow identification in the analysis of cloud shadow signatures in TROPOMI data. This is because cloud shadows are small-scale features (1 or a few TROPOMI pixels). The overpass measurement time difference between TROPOMI and VIIRS, which is a couple of minutes, is enough to move clouds at least 1 TROPOMI pixel (see ESA-ATMOS symposium oral presentation by Trees et al., 2021 [https://atmos2021.esa.int/iframe-agenda/files/Contribution\\_171\\_final\\_extabs.pdf](https://atmos2021.esa.int/iframe-agenda/files/Contribution_171_final_extabs.pdf)). This is particularly true for clouds that produce cloud shadows visible from space, because those shadow-producing clouds must be located at high altitudes where the wind speeds are relatively high. Additionally, near the cloud edges cloud evolution (i.e., cloud shape change) occurs. Cloud shadows should therefore be identified using measurements taken at the TROPOMI measurement time.*

The point raised have been answered in specific comment 47 below.

- *In Section 4.2.1, zoomed in areas are considered (a few pixel rows) of only two cases, while the spatial natural variability of the NO<sub>2</sub> VCD is actually very high (see e.g. your Figs. 2.c, 12.d and 13.d). In order to make sure that the observations are caused by 3D cloud effects instead of the natural variability, statistics of more observations are needed. In Section 4.2.2 shadowed pixels are compared with shadow-free neighboring pixels, but the cloud movement and evolution (see former paragraph) could consistently result in the situation where the actual shadows are located inside the neighboring pixels, while the identified shadow pixels are in fact shadow-free. Consistently confusing the shadowed pixels with non-shadowed pixels may result in false conclusions about the observed shadow induced NO<sub>2</sub> signatures.*

The points raised have been answered in specific comment 47 below.

- *The results shown in Section 4.2 are highly scattered (indeed no clear relation between TROPOMI NO<sub>2</sub> and VIIRS shadow fraction can be derived from Fig. 11.g, Fig. 14 and Fig 15). However, in the conclusions and abstract, it is written that NO<sub>2</sub> appears low-biased in observations. Considering the scattered results, together with the questionable approach that was followed (see former paragraphs), no reliable conclusions can be drawn from this analysis about the observed NO<sub>2</sub> bias dependence on shadows. Therefore, I suggest removing Section 4.2 and Appendix A from this paper and limit the analysis to only the modelling part (Section 4.1).*

We disagree with the reviewer that “no reliable conclusions can be drawn from this analysis about the observed NO<sub>2</sub> bias dependence on shadows”. We also do not agree that we have followed a “questionable approach”. The specific comments raised have been addressed in the answers below. In our opinion they do not change the main findings about the cloud shadow band cases discussed in 4.2.1 nor the results presented in the Appendix.

We agree that the results about the general cases in section 4.2.2 do not provide a strong case. Thus, we have removed the results from section 4.2.2 from the abstract and the conclusions. We still would argue that the data should be presented in order to guide future research on the topic.

We thus choose to keep section 4.2 with the changes described in the answers to the specific comments below.

## Detailed comments

1. *Page 1, line 10-11: limit your conclusion to only synthetic data.*

For the observational data we choose to keep the conclusion regarding the cloud shadow band. This is further discussed in comment 47 and 55 below. We have removed the conclusion concerning the data for general cases, see comment 56.

2. *Page 1, line 11-14: the low NO<sub>2</sub> bias in the observations is not significant (see later comments below).*

Please see answers to comments 47, 55 and 56 below.

3. *Page 4, Fig 1.b and Fig 1.c: Please avoid using a white color for the cloud pixels, since white is also one of the colors in the color bar.*

The clouds are now white in both Fig 1b and 1c. The color map have been changed to avoid any confusion.

4. *Page 4, Fig 1.c: The cloud shadow index is 1 below the clouds, but this would be invisible from space. I suggest removing the cloud pixels in this plot (such as in Fig. 1.b), such that the cloud shadows become visible.*

The color map has been changed and the cloudy pixels are shown as white, thus the cloud shadows are clearly visible.

5. *Page 5, Fig 2.a: It is difficult to see the colors of the RGB. Can you try to increase the brightness and/or enhance the colors?*

We have adjusted the lightness of the rgb plot so the colors are easier seen.

6. *Page 5: Fig 2: Please increase the size of the images. Discuss every subfigure when you introduce Fig. 2 in the text or remove the subfigure.*

To increase the image sizes would make the manuscript overly long. However, if the editors finds this useful the sizes may be increased. A brief discussion of the subfigures have been added to the text.

7. *Page 6, line 13: Why do you mention FRESCO here? Are you using FRESCO for your analysis? This is not yet clear for the reader at this point.*

It is mentioned on Page 3, line 30, that cloud corrections are made using the O<sub>2</sub>A-band. We have added FRESCO in parenthesis at this point.

8. *Page 6, line 28: You do not consider ocean cases. On Page 3, line 18, you mention that your focus is on Europe and different cloud types, and that therefore the results are expected to be general and applicable elsewhere. Would your results also be representative over ocean? And over desert, or over snow/ice?*

In the revised conclusions we make the statement “Profiles of NO<sub>2</sub> for polluted conditions, with increased NO<sub>2</sub> in the lower atmosphere below cloud tops, were considered as cloud shadow effects are not important for background NO<sub>2</sub> conditions where the amount of NO<sub>2</sub> below the cloud top is relatively small compared to the total column.” Most of the Earth’s ocean may be considered representative for background conditions. We have not specifically looked at desert or snow/ice surfaces, but we can not see why the results should not be applicable to polluted conditions for such surfaces as well. In the accompanying manuscript by Yu et al. (2021) the albedo dependence of the retrieval error is discussed.

9. *Page 7, line 1-3: they compare the spectral procedure, and found the latter to be far superior. Could you rephrase this? What is the spectral procedure? What do you mean by far superior?*

We have rephrased the sentence to: “The VIIRS cloud shadow mask algorithm is geometry-based and described by Hutchison et al. (2009). They compared the MODIS MOD35 product, which uses spectral signatures to identify cloud shadows, with geometry-based approaches and states that the latter “are far superior to those predicted with the spectral procedures”.

Note that the phrase “far superior” was used by Hutchison et al. (2009). This we have clarified by quoting Hutchison et al. (2009). Also note that Hutchison et al. (2009) provide no quantitative measure of the cloud shadow products, but rather make a qualitative comparison.

10. *Page 7: what are the accuracies of the VIIRS cloud mask and VIIRS shadow mask (regardless of the mapping to the TROPOMI grid)?*

The performance of the VIIRS cloud mask have been discussed by Hutchison et al. (2014). Over land they found agreement of 94.4% and 93.0% with manually generated cloud masks and CALIOP-VIIRS match-up datasets, respectively. The VIIRS cloud shadow mask is described by Hutchison et al. (2009). They do not provide a quantitative estimate of the VIIRS cloud shadow accuracy, but present convincing results of the performance of their algorithm. We are not aware of any other descriptions of such accuracy estimates and it is clearly outside the scope of this manuscript to provide such estimates.

11. *Page 7, line 16: From this explanation, it seems that the Cloud Shadow Index (CSI) also indicates fully cloudy pixels (as also shown in Fig. 1.c). Why is this the case? Wouldnt excluding cloudy pixels be better for the analysis of shadows which uses the CSI, such as Fig. 3? Or did you indeed apply a cloud filter? Please explain in this subsection, this is not clear for the reader at this point.*

Fig. 1c has been redone and the CSI is no longer shown for the cloudy pixels. It is stated in the caption of Fig. 1 that the retrieval is not done for cloudy pixels.

12. *Page 7, line 29-30: Why are the “ “ used here? Is this a citation? This is not a proper explanation of the AAI. Please rephrase and add a reference to de Graaf et al. (2005): <https://agupubs.onlinelibrary.wiley.com/doi/full/10.1029/2004JD005178>. For example: The AAI is a measure of the UV color of a cloud-, aerosol- and shadow- free 1-D atmosphere-surface model with respect to the measured UV color (de Graaf et al., 2005). When absorbing aerosols are present, the AAI tends to be positive, while the AAI is approximately zero or negative in the presence of clouds (see e.g. Kooreman et al., 2020; Penning de Vries et al., 2009). The “ “ indicates a quote and it is taken from Kooreman et al. (2020). We have rephrased the sentences as suggested.*

13. *Page 8, Fig 3: Please remove cloud pixels from your analysis, and if you did (already), please mention this in the caption of the figure.*

Cloud pixels are not included in the analysis. We have rephrased the caption to mention this.

14. *Page 8, line 14-16: The cloud shadow impact ... respectively. Please rephrase, this sentence is difficult to read. Are the percentages you mention here average values for a CSI of 1?*

We have rephrased the sentence so it now reads “The cloud shadow impact is seen to increase as the solar zenith angle increases. The number of pixels with NO<sub>2</sub> TVCD differences < -20% is 0.1% for a solar zenith angle of 20° (Fig. 3a), 4.% for 40° (Fig. 3b) and 20.3% for 60° (Fig. 3c).”

As stated in the text, the percentages are the number of pixels with NO<sub>2</sub> TVCD differences < -20%.

15. *Page 8, line 16: As the solar zenith angle increases a linear relationship appears .... Is there really a linear relationship? The data looks scattered. Can you please quantify the linear relationship with the corresponding uncertainty?*

We have added linear fits to the data in Fig. 3. including  $R^2$ -values. The caption of Fig. 3 and the text has been changed accordingly.

16. *Page 8, line 20: For both geometries the NO2 AMF is high ... is between 1-3%. Why? Can you physically explain these numbers here already? If not, please refer to this location in the paper explicitly when you can. For example, on page 12 line 11, you investigated the cause, and you can refer back: This explains the high AMF biased that we observed in Fig. 4a for CFw < 1%.*

We have rearranged the text as suggested. Please also see answer to comment 25.

17. *Page 9, line 3: ... there are comparatively more pixels with a negative bias for LEO geometry. Why? In lines 4 to 14 you explain that this is because the SAA en SZA are different, giving different sensitivity to cloud shadows for LEO and GEO geometries. Can you explain why this is the case?*

We have added the following explanation:

“For the LEO and GEO geometries studied, see Emde et al. (2021) for details, the sun is to the south of the study region. This implies that a relatively large portion of cloud shadows are on the northern sides of the clouds. These cloud shadows are partly hidden from GEO satellites but may be visible from LEO satellite instrument with a nadir view of Earth, thus giving different sensitivity to cloud shadows for LEO and GEO geometries.”

18. *Page 9, first paragraph: Please discuss Figure 5 in a separate paragraph.*

We have made a separate paragraph for the Fig. 5 discussion.

19. *Page 9 and 10, general comment: The results of the parameters such as SZA and surface albedo are discussed. The physical explanation is missing. After each finding, can make a connection here with the theory from your first paper (Emde et al. 2021)?*

When discussing Fig. 3 we have added an explanation of the solar zenith angle dependence and connected this with the paper of Emde et al. (2021). We have added further discussion, as suggested, in connection with the presentation of Fig. 4 and references are made to the papers by Emde et al. (2021) and Yu et al. (2021).

20. *Page 9 and 10, please explain better from theory of Emde et al. (2021) what the reader should be aware of when comparing LEO and GEO images (given the different SAA and SZA). What are the interesting differences between LEO and GEO results that you expect to see? And do you also observe in these simulated results what you expect from theory (Emde et al. 2021)?*

We have added a discussion about SSA and SZA differences between LEO and GEO geometries, see comment 17. Furthermore discussion with references to the papers by Emde et al. (2021) and Yu et al. (2021) have been added, see comments 17, 18, and 19.

21. *Page 10, Fig. 5: Why are the dots connected by lines, for example for (SZA=20 deg; SAA=45 deg) and (SZA = 40 deg, SAA = 270 deg)? Please reconsider the presentation of these results. Using 9 lines (for different albedo and SZA) instead of 3, or a bar chart, would suit better here.*

Fig. 5 has been redone with 9 lines as suggested.

22. *Page 12, line 4: east/west. How is the solar azimuth precisely defined? Make clear which SAAs belong to west and east.*

We have changed “west/east” to “west (SAA=-90°)/east (SAA=90°)” to indicate which SAA that belong to east and east.

23. *Page 12, Fig 8: please relocate the tick labels of the color bar such that it is clear to which color they belong.*

The tick labels have been relocated.

24. *Page 12, Fig 8: What are the tick labels 40 and 20?*

The labels have been changed so that the meaning is clear.

25. *Page 12, line 7-11: Generally ... effects. These lines are floating in the rest of the text, because they are a discussing of Fig. 4. Please move those lines to the discussion of Fig. 4, or make a connection to the former paragraphs.*

We have adopted these lines and moved them to the discussion of Fig. 4 as suggested.

26. *Page 13-14, general comment: Please reconsider Figures 9 and 10. Consider replacing Figures 9 and 10 by figures that show the NO<sub>2</sub> bias as functions of physical quantities such as SZA and albedo. This could make it easier to connect with the theory of Emde et al. (2021).*

Figs. 9 and 10 have been replaced by one figure which shows the NO<sub>2</sub> bias as functions of physical quantities.

27. *Page 13, Fig 9: Fig. 9 contains too much information. Why are the lines connected? A bar chart may suit better here. What are the different case numbers? It is not clear from the figure or the caption. Please prioritize the results you want to show and possibly compute averages of the cases. Think about the message you want to convey with this figure.*

Figs. 9 and 10 have been replaced by one figure. The case numbers have been replaced by solar and viewing angles and the reason for connecting the lines given in the caption.

28. *Page 13, Fig 9b: Is Figure 9.b really needed for the conclusions of your paper? Similar comment for Fig. 10b.*

Figs. 9b and 10b have been removed from the revised manuscript and the text adopted accordingly.

29. *Page 13, line 11: for similar reasons: What reasons? Additionally, are the reasons of the contamination as functions of SZA and VZA really (expected to be) identical? If yes, why?*

To clarify we have rewritten the sentence so it now reads: “This is due to geometry reasons which cause the cloud shadow to increase as the solar zenith angle increases. Also, as the viewing zenith angle increases a larger, potentially cloud shadow impacted, horizontal surface area will be viewed due to geometry reasons and thus the cloud shadow effect increase with increased viewing zenith angle.”

30. *Page 13, line 11-12: under- and overestimates, under- and overestimates of what? The NO<sub>2</sub> bias or AMF bias?*

It should read “under- and overestimates of the NO<sub>2</sub> TVCD”. This has been corrected.

31. *Page 13, line 12: Cloud shadows are a cloud feature metric that may be used to identify affected pixels, Fig 3. What do you mean by this sentence?*

We have rewritten this sentence to “The underestimates are due to cloud shadows, thus the cloud shadow fraction is a cloud feature metric that may be used to identify affected pixels, Fig. 3.”

32. *Page 14, line 1: occur. -> occur.*

Corrected.

33. *Page 14, line 1: ... also occur. Can you refer to the figure(s) where this was shown?*

We have clarified this sentence so it now reads: “However, while for large solar zenith angles pixels affected by cloud shadows are mostly underestimated, overestimates occur for all solar zenith angles, is mostly present for low cloud shadow fractions (Fig. 3) and increase for large surface albedo (blue dashed lines Fig. 9).”

34. *Page 14, line 1-2: ..., such as cloud top altitude and cloud optical thickness, are also of importance. How did you come to this conclusion? Can you show this or refer to the figure where this has been shown?*

This is shown by Emde et al. (2021) and we have added this reference to the sentence.

35. *Page 14, line 5: How precisely is the cloud enhancement effect visible in Figs. 9 and 10? Please explain.*

Figs. 9 and 10 have been reworked as mentioned above. The cloud enhancement effect is seen in the blue lines in the revised figures and this is now mentioned in the text.

36. *Page 14, line 7: “theta = 20 – 30 degrees”. How can the viewing zenith angle be observed in Fig. 9a?*

The solar and viewing angles are given in the x-tick labels in the revised Fig. 9.

37. *Page 14, line 12 to Page 15, line 4: What is the message of this paragraph? Do you mean that 3D cloud and cloud shadow effects are smaller than the NO<sub>2</sub> retrieval uncertainty?*

The purpose of this paragraph is to compare the magnitude of the 3D cloud error with other NO<sub>2</sub> retrieval errors. We have rewritten the paragraph to clarify this.

38. *Page 15, line 7-12: Should these sentences be part of Section 4.2.2 instead?*

We have moved these sentences to Section 4.2.2 as suggested. The text in section 4.2.2 has been slightly adjusted to accomodate this move.

39. *Page 15, line 20-22: please rephrase: : For a cloud shadow fraction ... standard deviation. Please add: The scatter in Fig. 11.g is too large to draw conclusions about the dependence of NO<sub>2</sub> on shadow fraction.*

We have added a phrase at these lines as suggested.

40. *Page 15, line 24-25: Thus indicating that ... cloud cases. Please rephrase this sentence: what is the subject of this sentence?*

We have rephrased this sentence.

41. *Page 16: can you please make the figures bigger?. Also, in Fig. 11.g, the lime green squares are not visible.*

The size of Figs. 11b-11f have been increased. The size of the lime green squares in Fig. 11 has been increased to make them visible.

42. *Page 16, Fig. 11: can you explain the oscillatory pattern in the geometric cloud fraction (Fig. 11.d) and the cloud shadow fraction (Fig. 11.f) in the shadow band?*

We have added the following text explaining this pattern: “The cloud shadow band has a width about the extent of 1-2 TROPOMI pixels. As the cloud shadow band and the TROPOMI pixels are not aligned this implies that the cloud shadow band at some locations will be completely covered by one TROPOMI pixel and at other locations partly covered by two TROPOMI pixels. This causes the oscillatory pattern seen in the geometric cloud fraction (Fig. 11.d) and the cloud shadow fraction (Fig. 11.f) in the cloud shadow band.”

43. *Page 16, fig 11.g: how do you precisely define CSF pixels? Doesnt each pixel has a certain CSF? Please clarify this in the caption.*

In the annotation of Fig .11g it should read “CSF> 0 pixels”. This has been corrected.

44. *Page 16, Fig 11.g: the variability is much larger than the differences between NO<sub>2</sub> (all pixels) and NO<sub>2</sub> (CSF pixels). No significant relation between NO<sub>2</sub> and CSF can be identified with this figure. Please clarify this explicitly in the text.*

This has now been mentioned explicitly in the text. See answer to comment 39 above.



45. *Page 17, line 4: For the cloud shadow band the NO<sub>2</sub> TVCD is on average reduced by 17%. Please add a sentence here explaining that only a few pixel rows are analyzed, while the NO<sub>2</sub> natural spatial variation is actually very large (Fig. 12.d).*

To clarify this we have changed this sentence so it now reads: “While the NO<sub>2</sub> spatial variability is large (Fig. 12.d), within the cloud shadow band covered by rows 262-269, the NO<sub>2</sub> TVCD is on average reduced by 17%.”

46. *Page 17, line 22-23: All cases show that the NO<sub>2</sub> TVCD in the cloud shadow is lower by 8-46% (average of 25%) compared with the NO<sub>2</sub> TVCD around the shadow. What about pixel row 396? Pixel row 396 seems to have a higher NO<sub>2</sub> TVCD in the shadow than south of shadow.*

We clarified this by changing the sentence to: “With the exception of the cloudy pixels south of the cloud band for row 396, all other cases show that the NO<sub>2</sub> TVCD in the cloud shadow is lower by 8-46% (average of 25%) compared with the NO<sub>2</sub> TVCD around the shadow.”

47. *Page 17, line 26-28: If it is assumed that the clouds are the main reason for the variations in the NO<sub>2</sub> TVCD over the cloud shadow bands, then these cases are examples of how cloud shadows give underestimates of NO<sub>2</sub> TVCD, in agreement with the theoretical idealized box cloud results presented by Emde et al. (2021) and Yu et al. (2021). I don't think you can conclude this, given the high spatial NO<sub>2</sub> variability (Figs. 2.c, 12.d, 13.d), the limited number of cases and pixel rows that were analyzed, the high scatter of the NO<sub>2</sub> bias as functions of shadow fraction (Fig. 11.g), and the questionable approach to mask clouds and shadows using VIIRS masks on the TROPOMI grid (due to the cloud movement and cloud evolution during the TROPOMI-VIIRS overpass time difference, the undiscussed VIIRS mask accuracy, and the oscillatory features in the geometric cloud fraction and shadow fraction in the shadow band (Figs. 11d and 11f)).*

Given the high spatial variability in the NO<sub>2</sub> TVCD we are actually surprised to find that for most cases the NO<sub>2</sub> TVCD is smaller in the cloud shadow band than outside it. The one explanation we have for this decrease in NO<sub>2</sub> TVCD is the 3D cloud effect presented by Emde et al. (2021). We thus find that despite the large spatial variability in the NO<sub>2</sub> TVCD, there is a clear signal of NO<sub>2</sub> TVCD decrease in the cloud shadow bands.

Note that Fig. 11g includes all cloud shadow pixels in the image and not only the cloud band, thus the high scatter. This has been clarified in the text.

The oscillatory features in the geometric cloud fraction and shadow fraction have been addressed in comment 42. The accuracies of the VIIRS cloud and cloud shadow masks have been addressed in comment 10.

Concerning the movement of clouds between the S5P and S-NPP overpasses we have added the following text to the manuscript:

“The time difference between the VIIRS and TROPOMI overpasses is about 4.2 min for the two cloud shadow band cases. For fast moving clouds this may give a shift in cloud and cloud shadow locations. For the two cloud shadow band cases discussed we investigated both ERA5 wind data and Spinning Enhanced Visible

and InfraRed Imager (SEVIRI) RGB images. The SEVIRI images have a time resolution of 15 min. and clearly show a southward movement of the cloud bands. The spatial resolution of SEVIRI together with possible cloud development make it challenging to precisely determine the speed of the cloud movement. We, however, estimate it to be on the order of 10-15 m/s in the southward direction perpendicular to the cloud shadow band. The ERA5 data have a large eastward component at the altitudes of the two cloud bands. For the 30 December 2019 case there is a much smaller southward component of about 10 m/s in agreement with the SEVIRI images. Surprisingly, for the 24 March 2019 case, the ERA5 data have a northward component of about 10 m/s, which is in disagreement with the SEVIRI observations. Trusting the SEVIRI images we find that the cloud mask and cloud shadow mask have shifted between 2.5 and 3.75 km perpendicular to the cloud shadow band between the TROPOMI and VIIRS overpasses. This is about the TROPOMI pixel size in this direction. For the 24 March 2019 case the cloud shadow band covers 1-2 TROPOMI pixels and it covers 2-4 TROPOMI pixels for the 30 December 2019 case. The cloud shadow band first viewed by VIIRS may thus be shifted southward when TROPOMI passes over. For the same geolocation, TROPOMI may thus view a smaller part of the cloud shadow band than VIIRS and hence be less affected by the cloud shadow. In Figs. 12 and 13 we average over the TROPOMI pixels identified to be affected by cloud shadow according to the VIIRS cloud shadow mask. Despite a possible reduction in the cloud shadow viewed by TROPOMI, a decrease is seen in the NO<sub>2</sub> TVCD for these pixels. We note that the cloud shift may in principle be corrected for using for example ERA5 data. However, as reported above, we find that SEVIRI and ERA5 data give different results.“

48. *Page 17, line 34: TROPOMI processes 25 million pixels per day. Why do you use for October 2018 and March 2019 only 1023081 pixels? What is the study region precisely?*

The study region is described in the Introduction. To clarify this we added the following text repeating the study region description “(covering approximately Germany, the Netherlands and parts of other surrounding countries, see Introduction)”. The reason for using the months of October 2018 and March 2019 is the solar zenith angle as explained in the text.

49. *Page 18, line 1: 35% of what precisely? 35% is a large percentage for cloud shadows, even in months where you expect cloud shadows. Can you please verify this number? How does this number relate to the overall cloud fraction of the data set?*

We have clarified this sentence and related it to the overall cloudiness as follows: “A NO<sub>2</sub> retrieval with the data quality value >0.95 was reported for 367,584 (36%) of the pixels. The VIIRS cloud mask identified 70.7% of the VIIRS pixels to be cloudy, indicating that clouds were the main reason for reducing the NO<sub>2</sub> retrieval quality for the majority of the TROPOMI pixels. Of the 367,584 pixels with high NO<sub>2</sub> retrieval data quality, a total of 129,180 (35%) were affected by cloud shadows according to the VIIRS cloud shadow product. Of the 45,926,808 VIIRS pixels 1,3438,968 (29.3%) were cloud free. Of these cloud free VIIRS pixels 17.8% contained cloud

shadows. This number is lower than the number of TROPOMI pixels affected by cloud shadows as is to be expected due to the higher spatial resolution of VIIRS.”

50. *Page 18 and 19, Fig 12 and 13: Fig 12 and 13 are hard to read. Please make the figures bigger. Figure 12.b and 13.b are problematic: can you ensure that the cloud movement and evolution during the TROPOMI-VIIRS overpass time difference did not consistently affect the shadow identification?*

We have enlarged Fig 12 and 13 by about 30%. For cloud movement discussion please see answer to comment 47.

51. *Page 18 and page 19, Fig.12.g and 13.g: only a couple of pixel rows are analyzed, and even within this small sample, the low NO<sub>2</sub> bias is not consistent. For example, in Fig. 12.g, the NO<sub>2</sub> TVCD is higher in the shadow than outside the shadow for rows 262 and 265.*

We presume it is rows 262 and 269 that are meant. For these two rows the NO<sub>2</sub> TVCD is smaller in the cloudless regions to the north of the cloud band compared to the shadow region. In the paper we discuss the problem of not having a “true” NO<sub>2</sub> TVCD. Thus, as clearly stated in the manuscript, our conclusions about the cloud shadow bands are based on the assumption that the NO<sub>2</sub> field is horizontally homogeneous. That this assumption may not hold for all cases is to be expected. However, in the lack of a “true” NO<sub>2</sub> TVCD, this assumption appears to be a good first guess. We have modified the discussion of Fig. 12g as follows:

“Except for rows 262 and 269, the NO<sub>2</sub> TVCD is smaller in the cloud shadow band compared to the NO<sub>2</sub> TVCD north of the cloud shadow. The NO<sub>2</sub> spatial variability is large (Fig. 12.d), despite this, for the cloud shadow band covered by rows 262-269, the NO<sub>2</sub> TVCD is on average reduced by 17%.”

For Fig. 13g the NO<sub>2</sub> TVCD is lower in the cloud shadow band for all cases presented.

52. *Page 20, line 10: no true NO<sub>2</sub> TVCD is available as for the synthetic data -> do you mean observational data?*

Yes, no true observational NO<sub>2</sub> TVCD is available. This has been clarified in the text.

53. *Section 4.2.2 general comment: The results in Figs. 14 and 15 are highly scattered, and no clear negative NO<sub>2</sub> bias from cloud shadows can be determined. This should be clear in the text, conclusions and abstract.*

It is written in section 4.2.2 that “no significant cloud shadow effect is visible in the NO<sub>2</sub> TVCD” for the data presented in Fig. 14 (Fig. 13 in revised manuscript). The data presented in Fig. 15 (Fig. 14 in revised manuscript) is carefully discussed in section 4.2.2 without making any firm conclusions due to the uncertainty in the data.

We have removed the reference to these data in the abstract and conclusions, see comments 1 and 56.

54. *Section 4.2.2 general comment: neighbor pixels in a 3x3 pixel matrix where used, and the true NO<sub>2</sub> TVCD is then taken to be the average of the cloud-free neighbors. Cloud movement and evolution during the measurements time difference of TROPOMI and VIIRS could consistently result in the situation where the actual shadows are located inside the neighboring pixels, while the identified shadow pixels are in fact shadow-free.*

We have added a sentence mentioning the possibility for cloud movement between VIIRS and TROPOMI overpasses.

55. *Page 23, line 15-19: For clearly identified cloud shadow bands ... with the theoretical findings. Why can you assume that the clouds are the main reason for the spatial NO<sub>2</sub> variations / assume that the NO<sub>2</sub> background is horizontally homogeneous?*

We discuss this in the answer to comment 47.

56. *Page 23, line 20-21: For a solar zenith ... to be impacted by cloud effects larger than 20%. Where did you show this? Also, please mention that the data is very scattered and comment on the uncertainty of your conclusions.*

This is shown at the end of section 4.2.2. Due to the high uncertainty in these numbers we have omitted them from the abstract and the conclusions.

57. *Page 24, line 1: You mention that there are large changes between versions of the VIIRS cloud shadow product. Could you elaborate on that? What is the accuracy of the VIIRS cloud shadow product itself (regardless of the mapping onto the TROPOMI grid)?*

We have added a footnote with the following text “The VIIRS L2 product changed version from v1r1 to v1r2 between 13 and 14 Aug 2018, see [https://www.star.nesdis.noaa.gov/jpss/documents/AMM/N20/Cloud\\_CBH\\_Provisional.pdf](https://www.star.nesdis.noaa.gov/jpss/documents/AMM/N20/Cloud_CBH_Provisional.pdf). Large changes in the cloud shadow product was seen between versions with v1r1 given unrealistic large number of pixels with cloud shadow. Realistic numbers were found with v1r2.”

Concerning the accuracy of the VIIRS cloud shadow product please see answer to comment 10.

58. *Page 24, line 12: As cloud shadow impact NO<sub>2</sub> TVCD retrievals, ... Do you mean instead: As cloud shadow impact both AAI and NO<sub>2</sub> retrievals, ...?*

Change made as suggested.

59. *Page 24, line 15: Indeed, over land the AAI is more negative over cloudy pixels, compare Fig. 11d and Fig. A1a. -> This seems not really to be the case when looking at Fig. 11d and Fig. A1a: the large cloud deck between 52 deg N and 52.5 deg N does not give more negative AAI. Clouds do not always decrease the AAI, they usually just don't increase the AAI (see e.g. Penning de Vries et al., 2009).*

We have changed the quoted sentence to “The behaviour of clouds on AAI is complex. For effective cloud fraction between 30-50% (5-30%) for thick (thin) clouds

Penning de Vries et al. (2009) reported negative AAI while for large cloud fractions high, thick clouds may cause positive AAI. The increase in AAI from scattered clouds to complete cloud cover may be seen when comparing Fig. 11d and Fig. A1a.“ In addition we have changed the color scale of Fig. A1a to better visualize the AAI.

60. *Page 25, line 2: ..., while the NO<sub>2</sub> TVCD shows some dependency on cloud shadow fraction, Fig. 11g. -> Please remove this part, the dependency on cloud shadow fraction from Fig. 11g is insignificant given the high variability.*

This part has been removed as suggested.

# Bibliography

- Emde, C., Yu, H., Emde, C., Kylling, A., van Roozendaal, M., Stebel, K., Veihelmann, B., and Mayer, B.: Impact of 3D Cloud Structures on the Atmospheric Trace Gas Products from UV-VIS Sounders - Part I: Synthetic dataset for validation of trace gas retrieval algorithms, *Atmospheric Measurement Techniques*, submitted, 2021.
- Hutchison, K. D., Mahoney, R. L., Vermote, E. F., Kopp, T. J., Jackson, J. M., Sei, A., and Iisager, B. D.: A Geometry-Based Approach to Identifying Cloud Shadows in the VIIRS Cloud Mask Algorithm for NPOESS, *Journal of Atmospheric and Oceanic Technology*, 26, 1388–1397, <https://doi.org/10.1175/2009JTECHA1198.1>, URL <https://doi.org/10.1175/2009JTECHA1198.1>, 2009.
- Hutchison, K. D., Heidinger, A. K., Kopp, T. J., Iisager, B. D., and Frey, R. A.: Comparisons between VIIRS cloud mask performance results from manually generated cloud masks of VIIRS imagery and CALIOP-VIIRS match-ups, *International Journal of Remote Sensing*, 35, 4905–4922, <https://doi.org/10.1080/01431161.2014.932465>, URL <https://doi.org/10.1080/01431161.2014.932465>, 2014.
- Kooreman, M. L., Stammes, P., Trees, V., Sneep, M., Tilstra, L. G., de Graaf, M., Stein Zweers, D. C., Wang, P., Tuinder, O. N. E., and Veefkind, J. P.: Effects of clouds on the UV Absorbing Aerosol Index from TROPOMI, *Atmospheric Measurement Techniques Discussions*, 2020, 1–31, <https://doi.org/10.5194/amt-2020-112>, URL <https://www.atmos-meas-tech-discuss.net/amt-2020-112/>, 2020.
- Penning de Vries, M. J. M., Beirle, S., and Wagner, T.: UV Aerosol Indices from SCIAMACHY: introducing the SCattering Index (SCI), *Atmospheric Chemistry and Physics*, 9, 9555–9567, <https://doi.org/10.5194/acp-9-9555-2009>, URL <https://acp.copernicus.org/articles/9/9555/2009/>, 2009.
- Yu, H., Emde, C., Kylling, A., Veihelmann, B., Mayer, B., Stebel, K., and van Roozendaal, M.: Impact of 3D Cloud Structures on the Atmospheric Trace Gas Products from UV-VIS Sounders - Part II: impact on NO<sub>2</sub> retrieval and mitigation strategies, *Atmospheric Measurement Techniques*, submitted, 2021.
